# Supplementary material
Source: Springer Nature journal article supplement (https://www.springermedizin.de/resource/supplementary/12885_2013_4644_MOESM2_ESM.pdf/9466938)

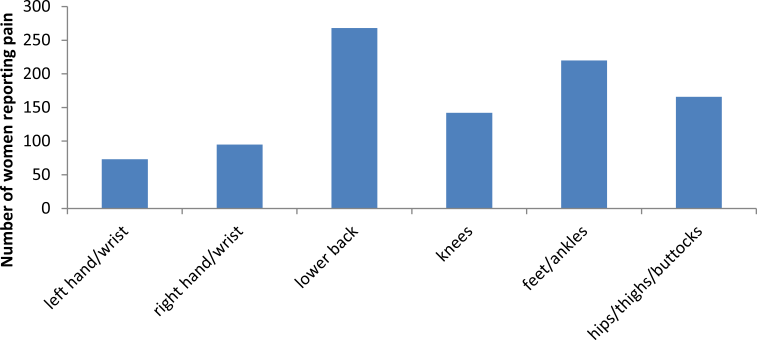

Supplement: MOESM2 [file 9466938]
